# Supplementary material for: The synthesis and characterization of the octahedral CoIII complex of a pyrrolopyrrolizine derivative formed with dicyanovinylene-bis-(meso-aryl)dipyrrin
Source: Royal Society of Chemistry journal article supplement (doi:10.1039/d0ra09452h), 2021-01-01
Supplement: d0ra09452h1.pdf [file d0ra09452h1.pdf]

Supporting information of

**Synthesis and Characterization of Octahedral Co<sup>III</sup> Complex of Pyrrolopyrrolizine Derivative Created with Dicyanovinylene-bis(*meso*-Aryl)-Dipyrrin**

Ji-Young Shin\*

Department of Molecular and Macromolecular Chemistry, Graduate School of Engineering, Nagoya University, Furo-cho, Chikusa-ku, Nagoya 464-8603, Japan. Fax: 81-52-747-6771; E-mail: [jyshin@chembio.nagoya-u.ac.jp](mailto:jyshin@chembio.nagoya-u.ac.jp)

**Content**

|                                              |        |
|----------------------------------------------|--------|
| 1. <b>Crystallographic projections</b> ..... | page 2 |
| 2. <b>Mass spectrum</b> .....                | page 3 |
| 3. <b>NMR spectra</b> .....                  | page 4 |
| 4. <b>FT-IR spectrum</b> .....               | page 8 |

## 1. Crystallographic projections

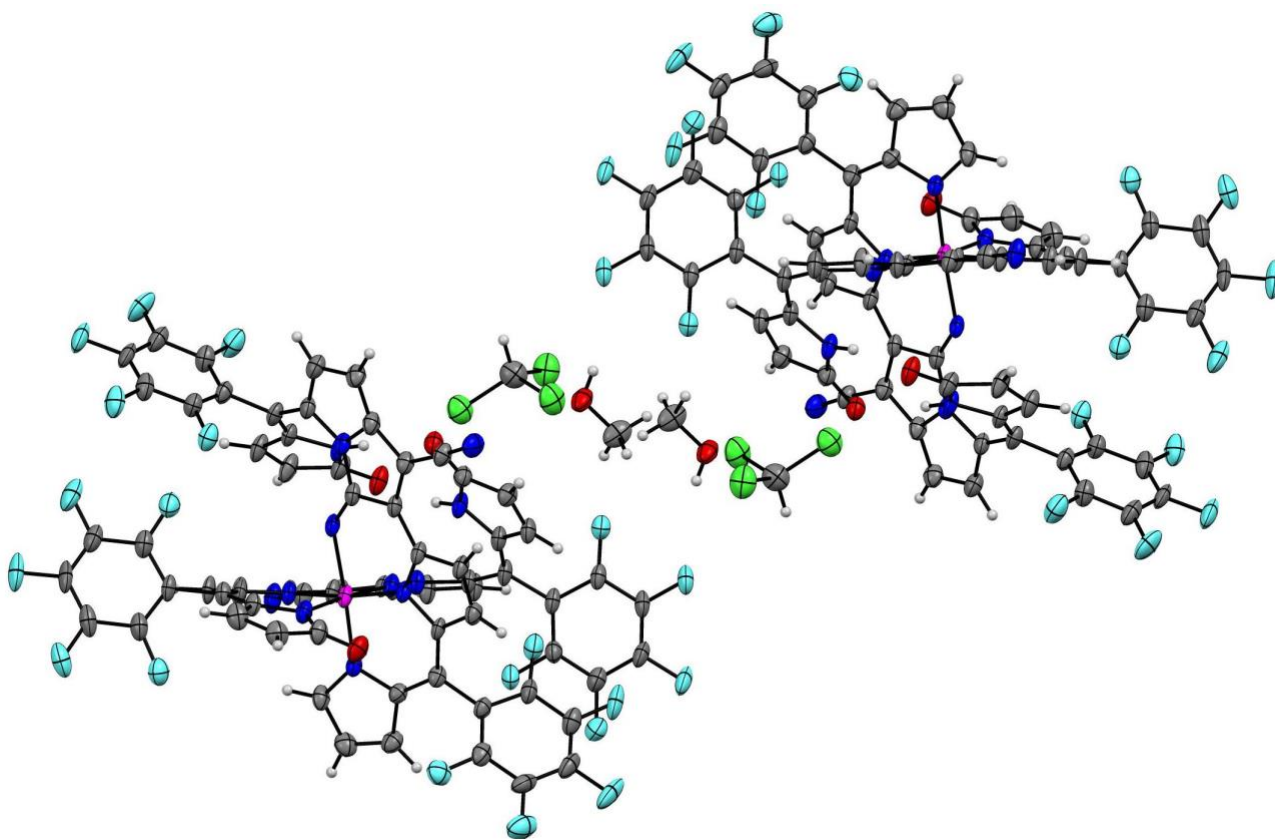

**Fig. S1** Crystal structure showing an enantiomeric set of the crystal structure of **1** and the solvent (chloroform and methanol) molecules.

(a)

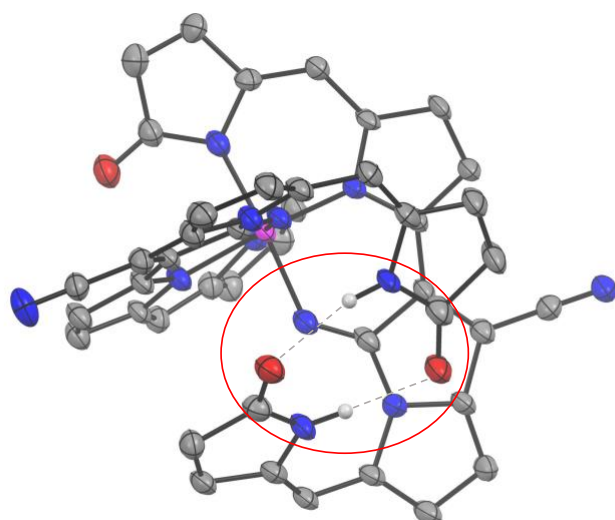

(b)

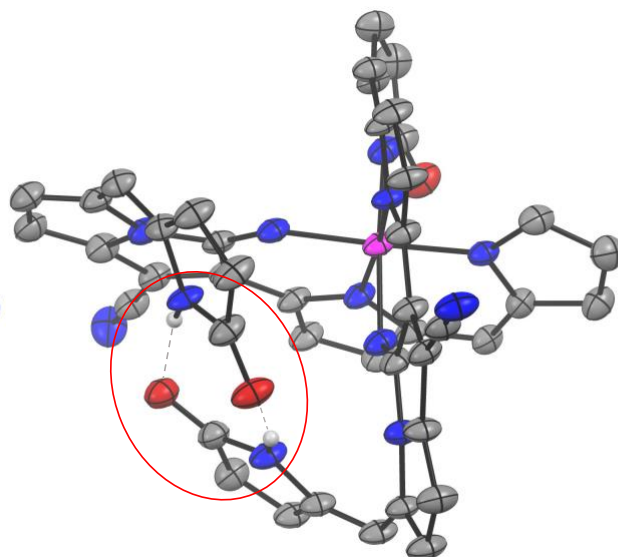

**Fig. S2** Crystal structure of **1**: (a) top view and (b) side view. *Meso*-aryls and hydrogen atoms except the disordered atoms forming hydrogen bonds are omitted for clarify. Hydrogen bonds for the disordered  $\text{NH}\cdots\text{O}$  were measured in 2.871 and 2.909 Å.

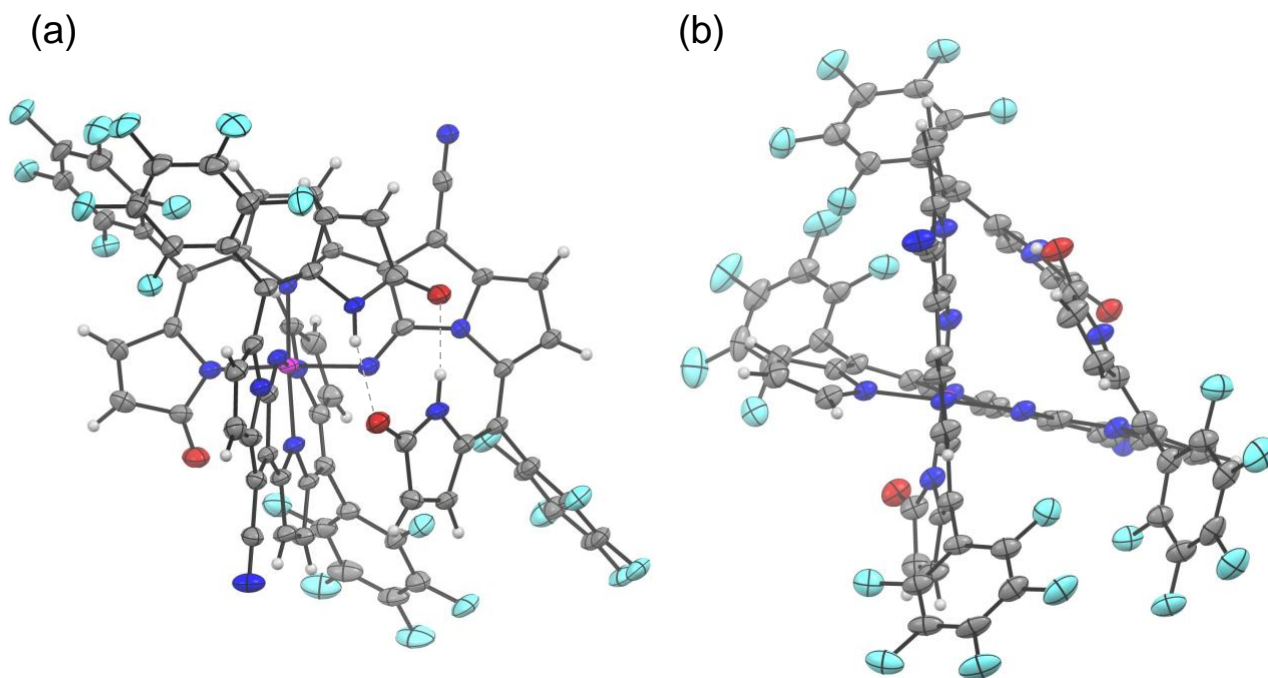

Fig. S3 Crystal structure of 1: (a) top view and (b) side view: The ellipsoid value was set in 50%.

## 2. Mass spectrum of 1

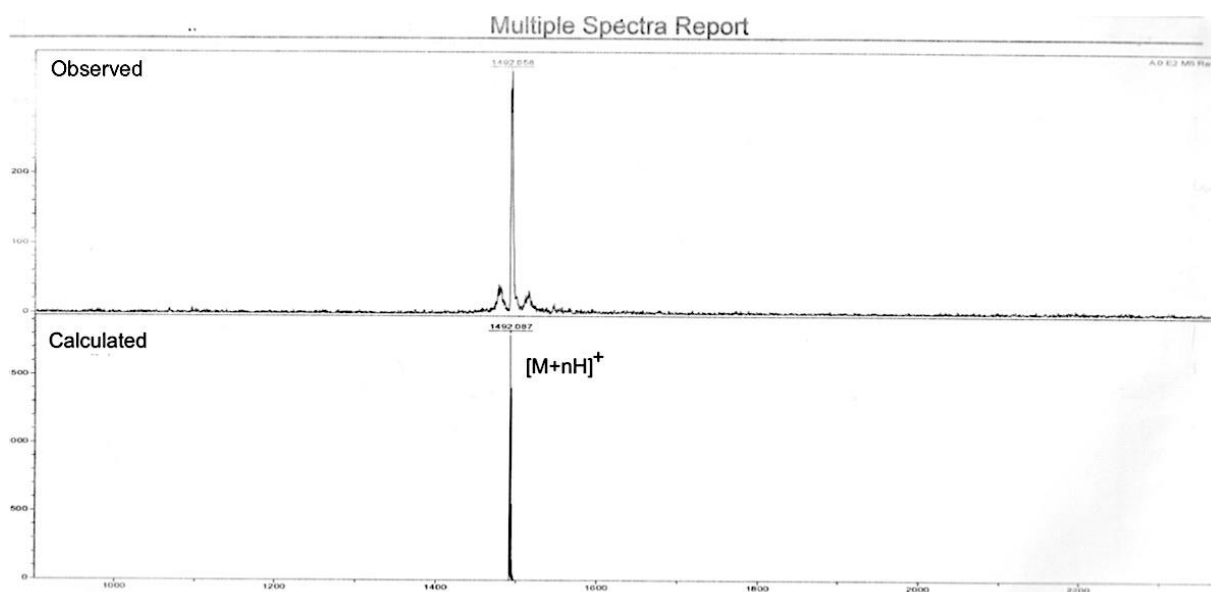

Fig. S4 MALDI-TOF mass spectrum of 1.

### 3. NMR spectra of 1

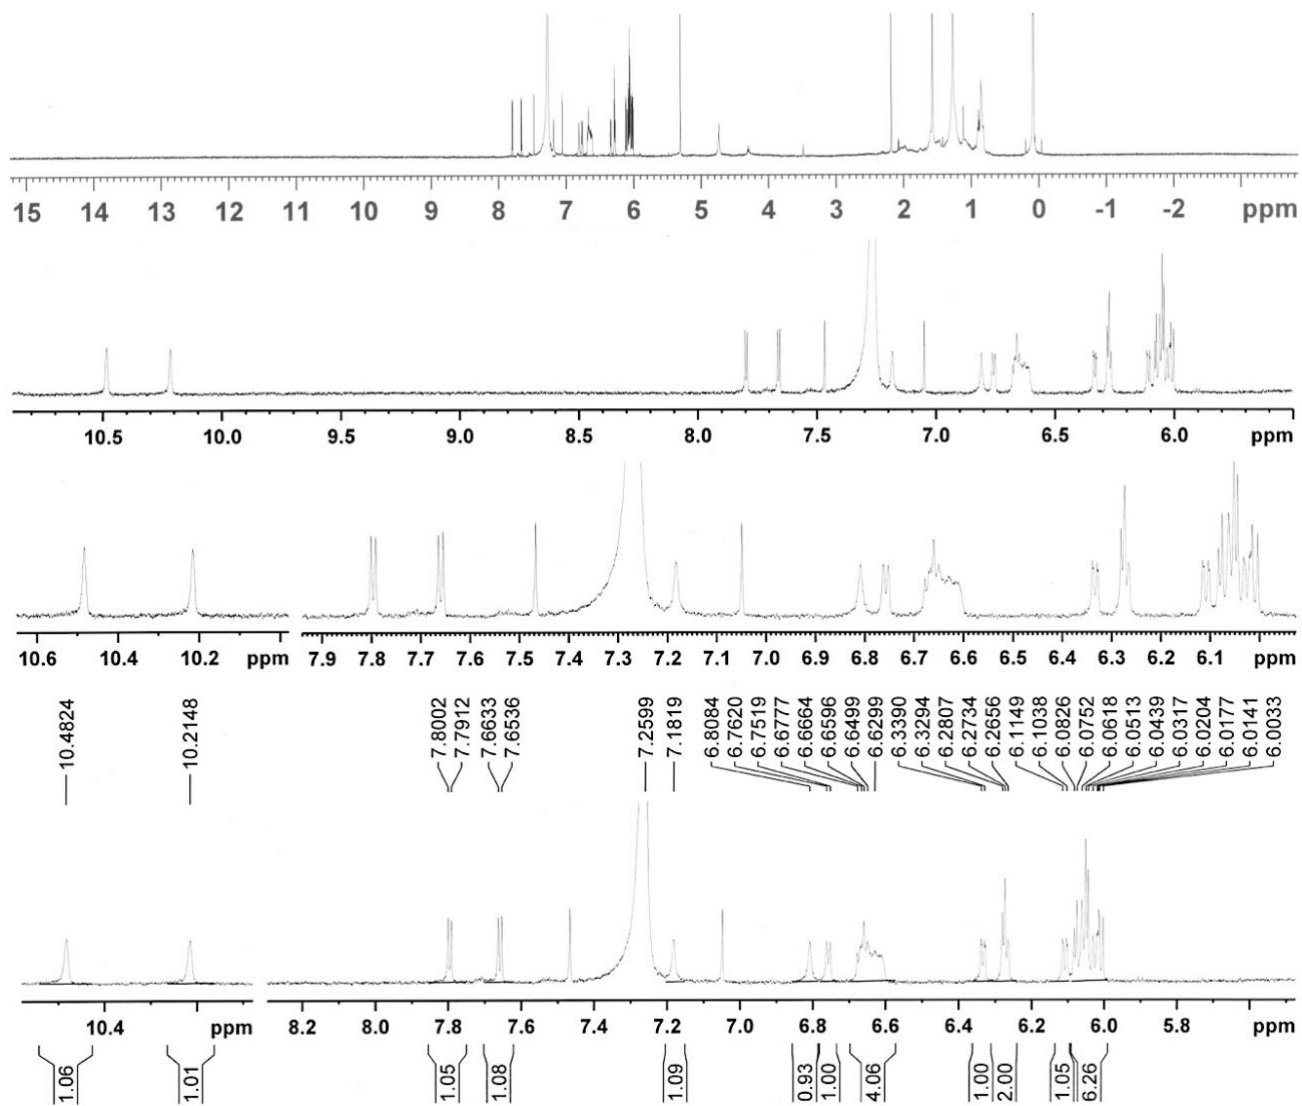

Fig. S5  $^1\text{H}$  NMR (500 MHz) spectrum of 1 in  $\text{CDCl}_3$ .

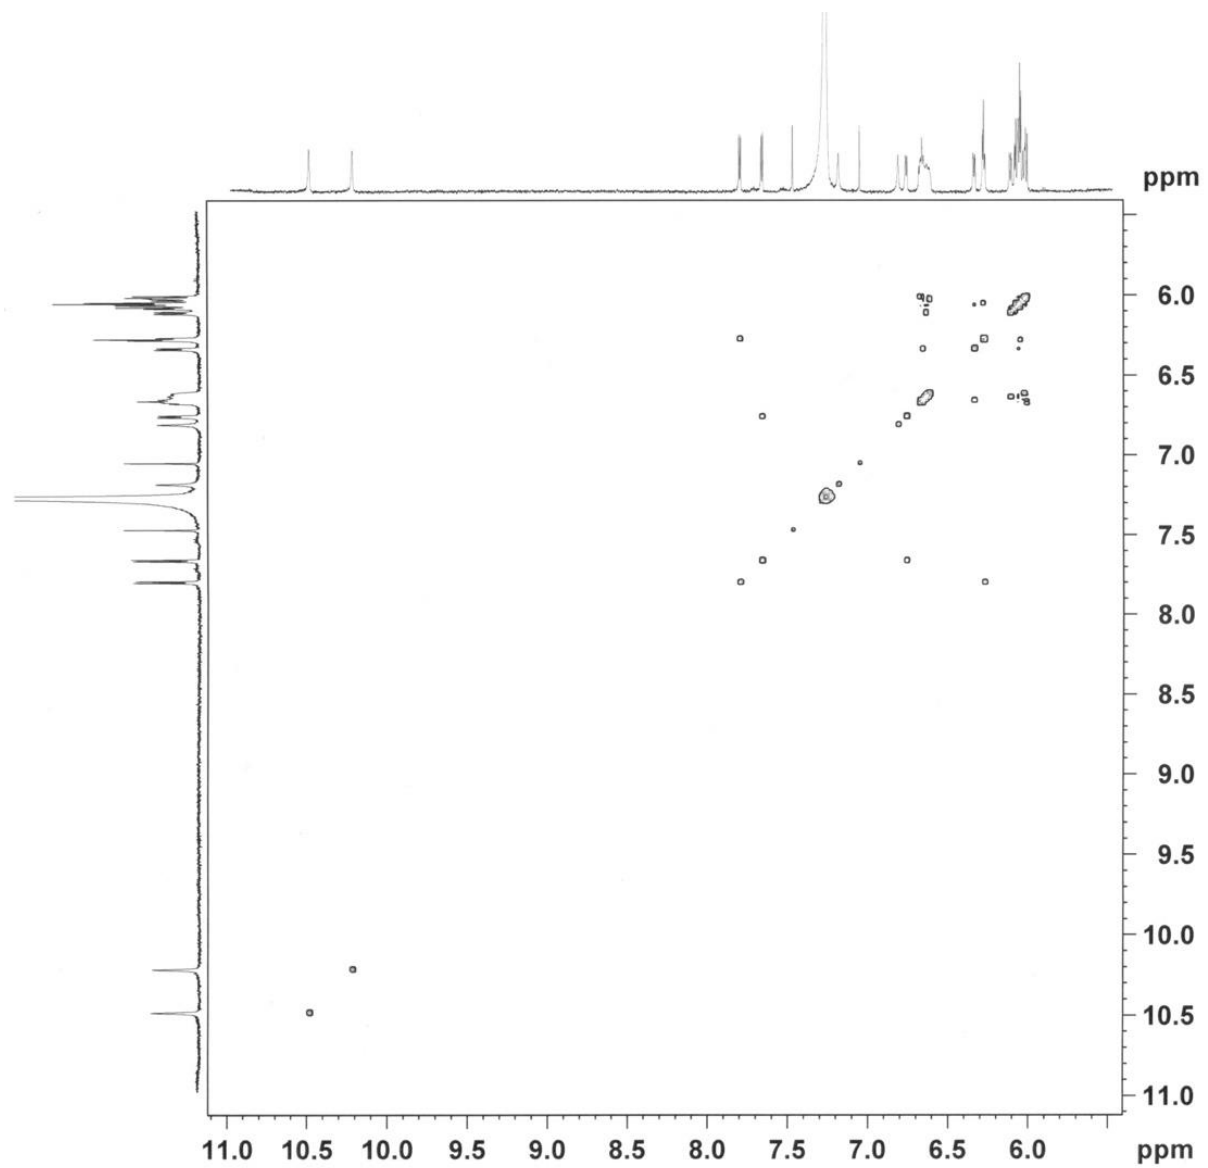

**Fig. S6** HH-COSY NMR (F1 channel = F2 channel = 500 MHz) spectrum of **1** in CDCl<sub>3</sub>.

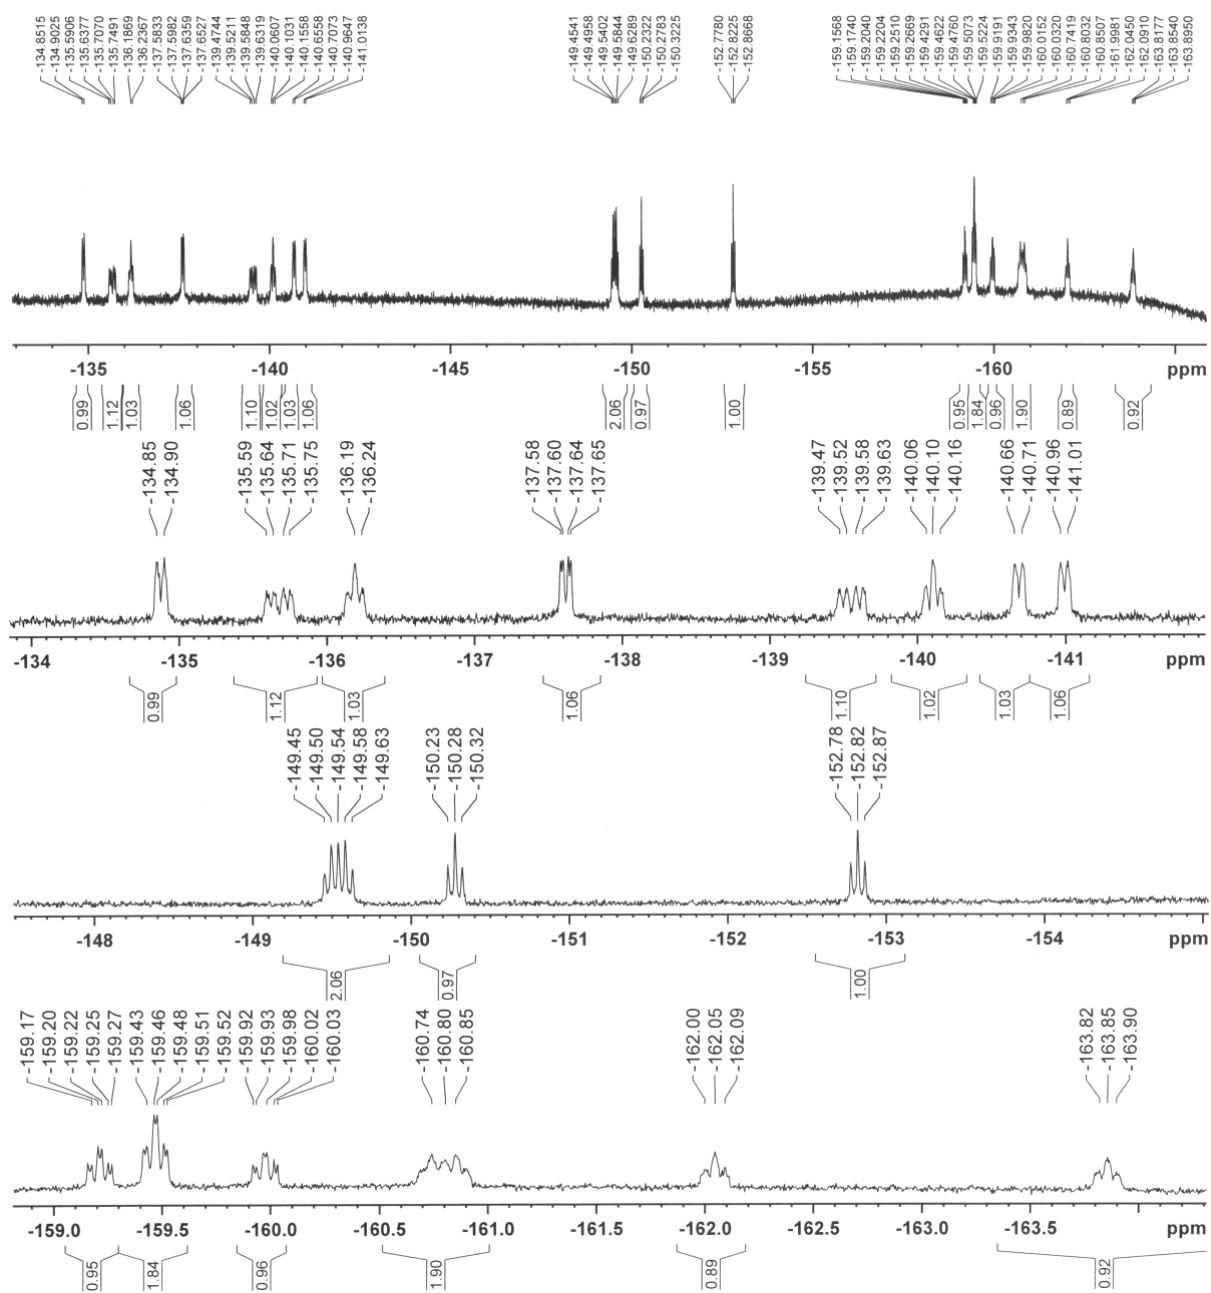

Fig. S7  $^{19}\text{F}$  NMR (470.57 MHz) Spectrum of **1** in  $\text{CDCl}_3$ .

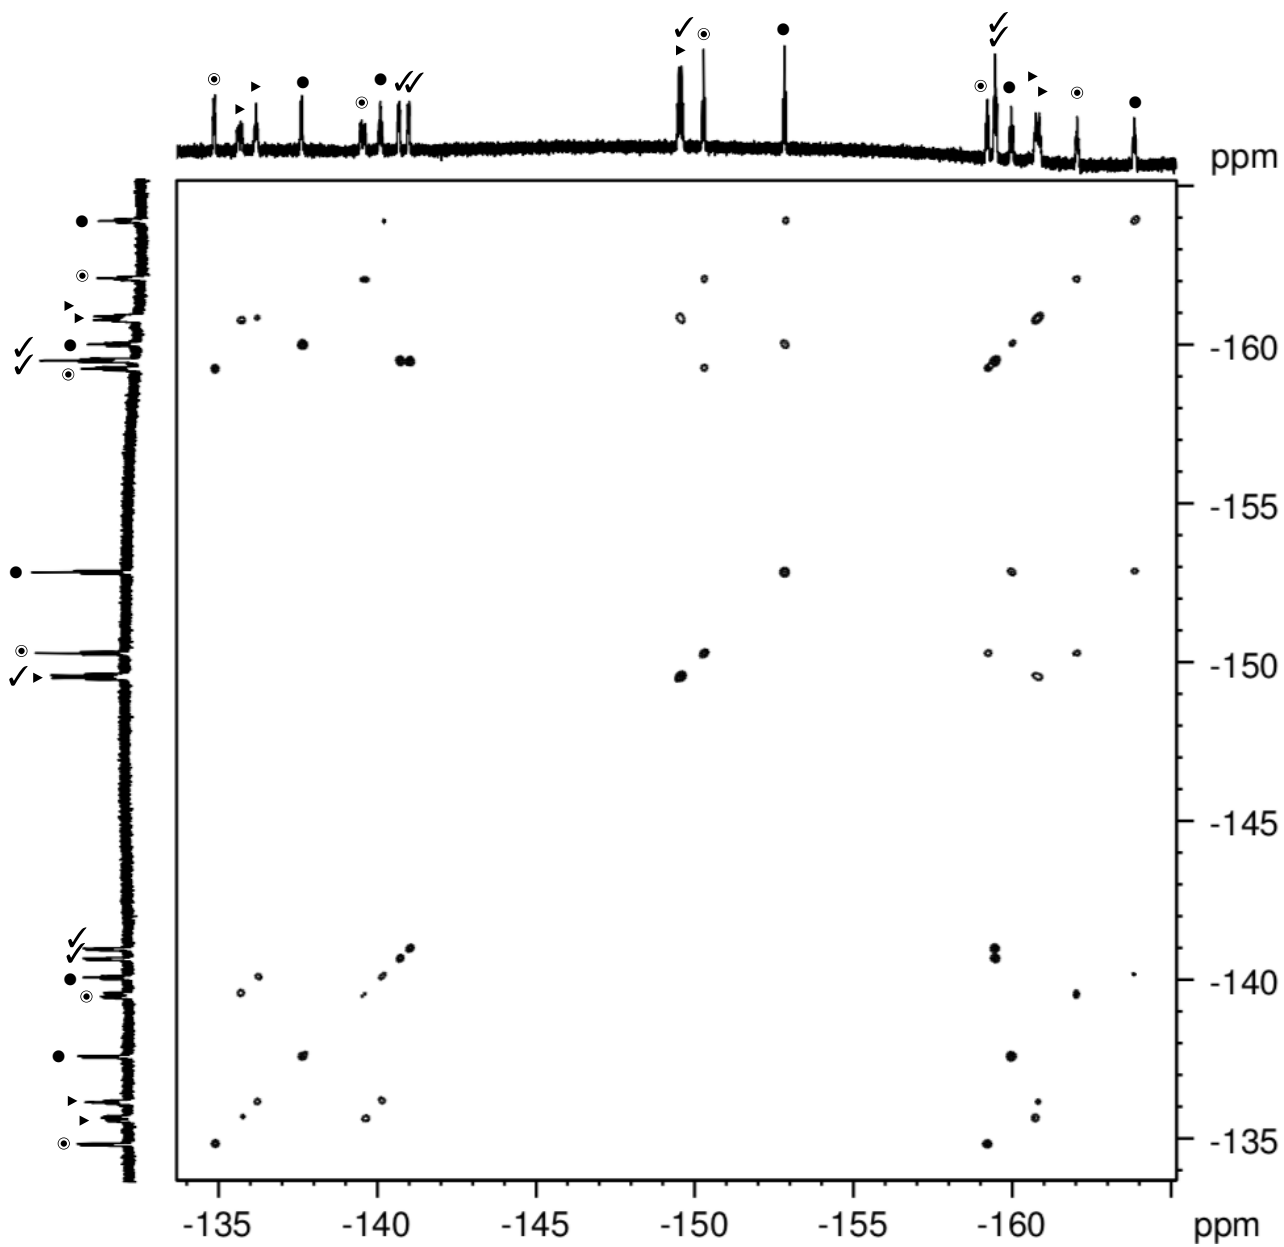

**Fig. S8** FF COSY NMR ( $F_1 = F_2 = 470.57$  MHz) spectrum of **1** in  $CDCl_3$ .

#### 4. FT-IR Spectrum of 1

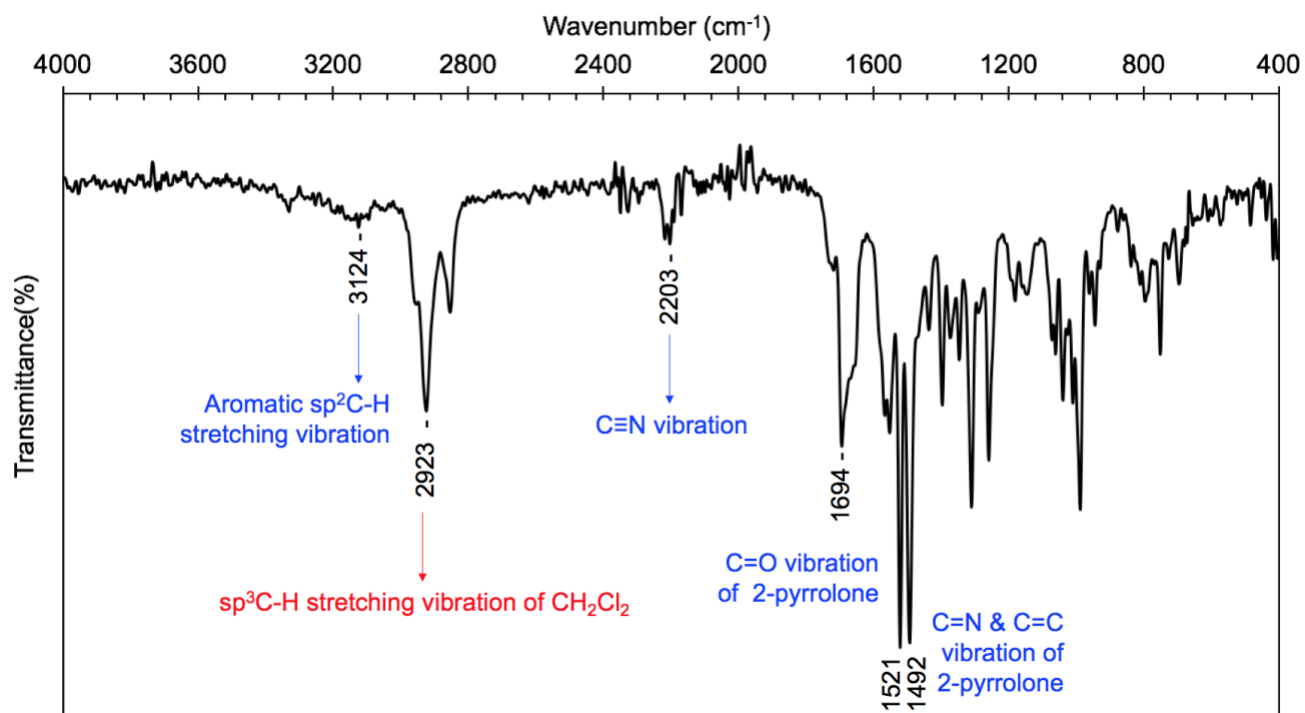

Fig. S9 FT-IR spectrum of 1 ( $\text{CH}_2\text{Cl}_2$ ).
